# Supplementary material
Source: HighWire-hosted journal article supplement (https://cmajopen.ca/highwire/filestream/90746/field_highwire_adjunct_files/3/open-2022-0181-4-at.pdf)
Supplement: open-2022-0181-4-at.pdf [file open-2022-0181-4-at.pdf]

#### Appendix 4 – ICD-10 codes used to refine the selection of neonates

| ICD-10 Code | Description                                                                                        |
|-------------|----------------------------------------------------------------------------------------------------|
| P59.9       | Neonatal jaundice, unspecified                                                                     |
| Z29.2       | Other prophylactic chemotherapy                                                                    |
| P04.0       | Fetus and newborn affected by maternal anaesthesia and analgesia in pregnancy, labour and delivery |
| P07.3       | Other preterm infants                                                                              |
| P22.1       | Transient tachypnoea of newborn                                                                    |
| P70.4       | Other neonatal hypoglycaemia                                                                       |
